# Supplementary material for: Debris flow modeling at Meretschibach and Bondasca catchment,Switzerland: sensitivity testing of field data-based erosion model
Source: Copernicus journal article supplement (doi:10.5194/nhess-2016-295), 2016-09-30
Supplement: Supplementary file [file nhess-2016-295-AC1-supplement.pdf]

1 *Interactive comment on “Debris flow modeling at Meretschibach and Bondasca catchments,*  
2 **Switzerland: sensitivity testing of field data-based erosion model”** by F. Frank, B.W. McArdell,  
3 N. Oggier, P. Baer, M. Christen and A. Vieli  
4 [florian.frank@wsl.ch](mailto:florian.frank@wsl.ch)

5  
6 **Reviewer 1: Z. Han**

7  
8 **General comments**

9  
10 **Reviewer 1:** This paper aims to simulate debris-flow process by considering bed erosion along the  
11 path. As erosion is a complex natural process and plays a very crucial role both in debris-flow  
12 dynamics, transportation, run out and deposition process, it is a very important research topic. To  
13 do so, this paper attempts to combine an empirical entrainment model which has been previously  
14 introduced by authors into the RAMMS model. The sensitivity of the developed model is tested by  
15 applying the model to two debris-flow events in Switzerland. The results show some interesting  
16 erosion and flow patterns.

17  
18 **Authors:** We are grateful for the thorough reading of the manuscript and the helpful review, which  
19 we think will substantially improve the manuscript. We address both the general and specific  
20 comments below.

21  
22 **Reviewer 1:** Generally, this is a straight-forward development of the RAMMS model for the  
23 simulating bed erosion in debris flows. The paper is well illustrative and authoritative. The authors  
24 build upon their previous work and extend the RAMMS model to the erosion simulation. It is a  
25 major contribution and is sound. However, in my opinion, the major limitation of this paper is that  
26 the described debris-flow entrainment model is rather sensitive to the empirical coefficients, and  
27 these coefficients are not well illustrated in the paper. Indeed, the authors show us a sensitivity  
28 analysis of erosion volume to the initial volume, erosion rate and calibrated parameters and in  
29 Fig.7. As they mention, the value of these parameters are suggested by the previous study in the  
30 same region, e.g., the erosion rate  $dz/dt = 2.5$  cm/s. However, the rational range of these parameters  
31 may be different in other regions, there is a need to explain how to determine these parameters. The  
32 paper could be improved and made more accessible by further exploring these empirical  
33 parameters. I recommend this paper for publication after major revisions.

34  
35 **Authors:** Yes, we agree that the results of the model are quite sensitive to the empirical  
36 coefficients and the initial conditions, which is the main focus of the manuscript. The uncertainties  
37 in the field data (e.g. initial flow volume, volume of eroded sediment, magnitude of erosion) are

38 generally fairly large. It may be by chance that the same coefficients deliver plausible results at  
39 three different debris-flow sites in the Swiss Alps when in fact it may be possible to refine the  
40 coefficients in cases where more precise field data are available. For this reason, all of the  
41 coefficients can be adjusted when more or better results become available. We intend to edit the  
42 manuscript to make this point more clear. To further explore the influence of the parameter  
43 combinations, we also intend to highlight the inherent feedback in the model, whereby a rapid  
44 erosion rate results in an increase in flow depth leading to larger shear stresses and then to even  
45 larger potential erosion depths. This potentially explains the very rapid growth of debris flows,  
46 which is has been observed in some natural field cases and also in laboratory experiments  
47 involving realistic debris-flow sediments (e.g. Logan & Iverson, 2007, Video documentation of  
48 experiments at the USGS Debris-flow flume 1992-2006, U.S. Geological Survey Open-File Report  
49 2007-1315).

50

#### 51 **Specific comments**

52

53 **Reviewer 1: Page 6, 195-196.** The authors mention that the slope angle  $\phi$  in the deceleration term  
54  $S_f$  is similar to the internal friction angle of the material. Does it mean that  $S_f$  will be the same  
55 when at a steep slope and a gentle slope? Please check it.

56

57 **Authors:** Yes, it is true that the slope angle is similar to the angle of internal friction at this slope.  
58 However we do not imply that the value of  $S_f$  in the Voellmy friction relation is the same as the  
59 value of internal friction in general. We intend to remove this comment to avoid confusion for  
60 readers, because the Voellmy friction angle is typically selected based on other criteria.

61

62 **Reviewer 1: Page 7, 221-222.** The critical shear stress  $\tau_c$  determines the maximum potential  
63 erosion depth  $e_m$ , the erosion will not be existed at the area where  $\tau < \tau_c$ . For this reason, the critical  
64 shear stress is a key parameter for controlling the shape of erosion area and erosion depth. But the  
65 authors superficially use an empirical value 1 kPa in the paper, and no sensitivity analysis is made.  
66 It seems that they could simply test and provide results on how sensitive the simulation is to the  
67 choice of the critical shear stress  $\tau_c$ .

68

69 **Authors:** Yes, we did not include results for the sensitivity analysis regarding the value of the  
70 critical shear stress, because the influence is generally much smaller and the range of critical shear  
71 stress values is small. We disagree that our choice and use of 1 kPa is superficial, because this  
72 value based on indirect observations by Schürch et al. (2011, cited in the original manuscript) and it  
73 serves a general purpose of describing that torrent channel beds are typically not eroded by small  
74 debris flows. We do not know the precise value in the field at any field site however a value near 1

75 gives a good fit to the data set we used for that analysis. Using a Shields's criteria for critical shear  
76 stress from river engineering, we find a critical shear stress which is smaller than 1, depending on  
77 the grain size on the channel bed. We discussed the issue of different critical shear stresses in our  
78 first erosion model application at the Spreitgraben catchment (Frank et al., 2015). Therein, we  
79 described smaller debris flood events which produced about 4-5 kPa of shear stress but did not  
80 show any significant erosion in the channel bed, i.e. suggesting that the critical shear stress  $\tau_c$  may  
81 be somewhat larger in the Spreitgraben than in the Illgraben channel.

82 We propose inserting a paragraph discussing this issue in more detail, especially noting that the  
83 value is close to zero, or could be set to zero if field evidence indicates that erosion is always  
84 expected. However we will gladly include such a plot as an additional figure if this is desired by  
85 the editorial staff.

86

87 **Reviewer 1: Page 11, 360.** The total erosion volume remains approximately constant when the  
88 initial volume exceeds a certain value. How to explain this phenomenon? Is this because the  
89 maximum erosion depth  $e_m$  is reached as controlled by the critical shear stress  $\tau_c = 1$  kPa? As such,  
90 it seems that the choice of  $\tau_c$  as a model parameter should be discussed to a greater degree,  
91 especially if you want your method to be used more widely on debris flows of varying properties.

92

93 **Authors:** In fact, the volume continues to increase (the y-axis is a logarithmic scale). The  
94 maximum erosion depth  $e_m$  may be limiting – however  $e_m$  also increases due to increasing  
95 maximum flow heights (see also Fig. 3 in Frank et al., 2015) when systematically enlarging the  
96 initial release volumes in the sensitivity analysis. Again, the model is insensitive to the value of  
97 critical shear stress once that value is exceeded (please refer to our comment above).

98

99 **Reviewer 1: Page 12, 396-397.** As I see in Fig.3, there is no significant difference of runout  
100 distance in B2 ( $\mu=0.6$ ) and B3 ( $\mu=0.7$ ). Please check the sentence “ $\mu$  controls the runout distance”.

101

102 **Authors:** The sentence “ $\mu$  controls the runout distance” is consistent with the Voellmy friction  
103 relation as used in runout models such as RAMMS. It is not a result from this present study. We  
104 will provide a suitable literature citation for that statement and adjust the wording to ensure that  
105 readers do not see this as a result of this project. Perhaps the problem lies in the illustration of the  
106 modeling results for three  $\mu$  values. The calculation domain, where the software was used, was  
107 limited in spatial extent to the area where we have differential DTM data for comparison (e.g. the  
108 blue polygon in Fig. 3A), so we actually do not show the final runout distance. In the process of  
109 answering this comment, we noticed that the blue polygon is drawn inconsistently in figure 3B1-  
110 B3, but it is drawn correctly in Fig. 3A. We will also correct this error in the final manuscript.

111

112 **Reviewer 1: Page 27, 675.** The total erosion volume in both cases show an abrupt decrease, and  
113 then a significant increase with the initial release volume, i.e., 1-2 m<sup>3</sup> in Meretschi and 10-20 m<sup>3</sup> in  
114 Bondasca. Is there any rational explanation on it?

115

116 **Authors:** When comparing erosion depths as modeled using 10 vs. 20 m<sup>3</sup> as the initial volume in  
117 the Bondasca case e.g., we observed that the model run using 20 m<sup>3</sup> is large enough that part of the  
118 flow enters a secondary channel. The volume of the flow, then divided among two channels, causes  
119 a reduction in flow depth and a consequent decrease in shear stress, resulting in smaller erosion  
120 depths and therefore smaller erosion volumes. When using an initial volume of 10 m<sup>3</sup> then the flow  
121 fully stays in the main channel.

122 We propose adding a small discussion paragraph explaining this issue.
