# Supplementary material for: Debris flow modeling at Meretschibach and Bondasca catchment,Switzerland: sensitivity testing of field data-based erosion model
Source: Copernicus journal article supplement (doi:10.5194/nhess-2016-295), 2016-09-30
Supplement: Supplementary file [file nhess-2016-295-AC2-supplement.pdf]

1 *Interactive comment on “Debris flow modeling at Meretschibach and Bondasca catchments,*  
2 **Switzerland: sensitivity testing of field data-based erosion model”** by F. Frank, B.W. McArdell,  
3 N. Oggier, P. Baer, M. Christen and A. Vieli  
4 [florian.frank@wsl.ch](mailto:florian.frank@wsl.ch)

5  
6 **Reviewer 2: Anonymous**

7  
8 **General comments**

9 The paper deals with bed entrainment for debris flows in Switzerland using numerical modelling.  
10 The topic is of interest for the Journal and the specific issues of this paper are relevant to scientists  
11 and practitioners. Some (mandatory) changes are required to improve the paper before acceptance.  
12 The list of specific comments and suggestions is given in the attached file.

13 **Authors response:** We are grateful for the helpful specific comments, especially literature  
14 citations which were not cited in the last version of the manuscript. These comments should  
15 substantially improve the manuscript. Please see our responses to the specific suggestions below.

16  
17 **Specific comments**

18  
19 **Reviewer 2: Page 1, lines 23-24.**

20 why this choice. Basal friction and bed entrainment are interplaying in natural processes. Why  
21 separate calibration?

22 **Authors:** We decided to first calibrate the runout of the model based on the total volume of the  
23 event and the runout distance, and then work with smaller initial volumes, then including the  
24 erosion algorithm, to refine the results. Our goal was to avoid a time-intensive iterative procedure,  
25 especially for the benefit of practitioners who generally do not have time to go through a long  
26 calibration process. However the model could also be calibrated by starting with small landslide  
27 volumes, so this is just a statement of how we performed the calibration.

28  
29 **Reviewer 2: Page 2, line 34.**

30 you mean rheology?

31 **Authors:** This sentence would be better stated as follows: “Sediment erosion caused by debris  
32 flows causes flow bulking (in our case an increase in flow mass; Iverson 1997) which strongly  
33 influences the runout behavior of debris flows.” We suggest to change it to clarify this.

34  
35 **Reviewer 2: Page 2, line 38.**

36 quote also works of:

37 - Cascini et al. (2106) Eng Geol

38 - Cuomo et al. (2016) Eng Geol

39 - Cuomo et al., (2014) Canadian Geotechnical Journal

40 where bed entrainment is discussed as far as its spatial-temporal variation, and its interplay with  
41 rheology

42 **Authors:** Thank you for pointing out this additional literature, which we did not initially consider  
43 for this manuscript. However our focus is not on the rheology of the flow or changes in the  
44 rheology as a consequence of entrainment. As stated in the manuscript, we use the Voellmy friction  
45 relation and we do not adjust the Voellmy friction coefficients as a function of flow properties.  
46 However we propose including this as a discussion point, where we will be able to cite some of  
47 these publications.

48

49 **Reviewer 2: Page 2, line 45.** what is this? bed entrainment? you may also call erosion. But bulking  
50 process is hard to understand and not common in international literature.

51 **Authors:** The term “bulking” is commonly used in the literature to describe the increase in mass of  
52 a debris flow along the flow path ,e.g. see Iverson, R. M.: The Physics of Debris Flows, Reviews of  
53 Geophysics, 35, 245-296, 1997. doi: 10.1029/97RG00426, 1997, for a clear explanation in a paper  
54 which is very widely cited by debris-flow and landslide researchers throughout the world. A quick  
55 search on an academic search engine also indicates that “bulking” is commonly used in the debris-  
56 flow literature by authors from many countries outside of Switzerland, so we respectfully disagree  
57 with Reviewer 2 on this point. We realize that it may have other meanings in other academic  
58 disciplines, so we propose that we clarify the terms like this in the next version of the manuscript.

59

60 **Reviewer 2: Page 2, line 55.**

61 is there any difference?

62 **Authors:** Erosion removes sediment from the channel bed, bulking describes the increase in size  
63 (mass) of the flow, so the two terms are closely related but not interchangeable. As stated above,  
64 we will, in the next version, provide definitions of the terms.

65

66 **Reviewer 2: Page 2, lines 57-61.**

67 there are cases where neglecting erosion one may obtain unsafe future scenarios, as bed  
68 entrainment change the propagation pattern, and thus influence the global behaviour of the  
69 landslide. This is especially true for debris avalanches (not channelised). However, also for debris  
70 flows, including the entrainment helps obtaining better model estimates. See, for instance Cascini  
71 et al. 2014 Geomorphology

72 **Authors:** Thank you for pointing out this paper, which we will consider citing for the next version  
73 of the paper. We agree that including entrainment may help users to obtain more accurate  
74 predictions.

75

76 **Reviewer 2: Page 2, lines 73-74.**

77 add models by Pastor et al.. You may find applications in previous works of Cuomo et al.

78 **Authors:** Thank you for pointing out these additional papers, which we will cite, if appropriate, in  
79 for the next version of the manuscript.

80

81 **Reviewer 2: Page 2, lines 76-79. Also line 165 (which does not have a comment, just a  
82 highlight).**

83 are you using erosion, entrainment and bulking with the same content?

84 **Authors:** It is not clear to us if this comment is about the terminology or the differences in the bulk  
85 properties of the flow vs. the channel bed, so we will address both comments:

86 A. In our case, the bulking (increase in mass of the flow) produced by entrainment (the process  
87 described in the model which specifies how fast and where the additional sediment enters the  
88 debris flow) should be clear (also see our comments above regarding terminology). Net  
89 entrainment of sediment (erosion – deposition) results in net erosion of the channel bed (a decrease  
90 in the elevation of the channel bed), which can then be characterized in a spatial sense with a  
91 description of a pattern.

92 B. Although it is possible to specify a different mass density for the sediment that is entrained from  
93 the channel bed, to a first approximation the mass densities of the two are similar, at least in  
94 torrents which experience frequent debris flows. In more detail, the degrees of sorting and ranges  
95 of grain sizes in both the flow deposits and the channel bed are fairly similar. However the model  
96 accounts for differing densities, if such values are available.

97

98 **Reviewer 2: Page 6, line 192.**

99 turbulent factor. And, it is does not depend on  $v^2$ . rephrase the whole sentence.

100 **Authors:** Thank you for pointing out that this is not clear to you, we propose that we re-write the  
101 sentence in question.

102

103 **Reviewer 2: Page 7, line 220.**

104 ??

105 **Authors:** Thank you for pointing out the error in the reference number of the equation, we will fix  
106 that in the next version of the manuscript (it should be Eq. 6).

107

108 **Reviewer 2: Page 7, line 221.**

109 from where this value? / from where?

110 **Authors:** These values were described by Frank et al. (2015), however upon re-reading the  
111 paragraph above Equation 6, we realize that we should add more details in the next version of the  
112 manuscript. Additionally, we propose adding “Frank et al. (2015)” at the end of the sentence to  
113 make the origin more clear to the reader.

114

115 **Reviewer 2: Page 7, lines 229-230.**

116 check numbering of eqs

117 **Authors:** Thank you for pointing out the error in the reference to the equation, we will correct and  
118 verify all equation numbers when preparing the next version of the manuscript.

119

120 **Reviewer 2: Page 9, line 281.**

121 -2.5 ?

122 **Authors:** We agree with your suggestion we will also change the value to SI units, so -0.025 m/s,  
123 also for other occurrences of  $\frac{dz}{dt}$  values in the manuscript.

124

125 **Reviewer 2: Page 10, line 314.**

126 how this was fixed?

127 **Authors:** The parameter  $\xi$  was determined by varying it within the range proposed by the  
128 developers of the RAMMS model ( $\xi = 100, 200, 400$ ) and inspecting the results. The only realistic  
129 velocities (in the steep ( $\approx 60\%$ ) study reach of the Meretschibach channel) are obtained using  $\xi =$   
130 200 when combined with the variation of parameter  $\mu$  ( $= 0.5, 0.6, 0.7$ ). This is explained in the  
131 manuscript on page 10, lines 312-316. However to ensure that this is clear, we propose adding a  
132 sentence to clarify this procedure.

133

134 **Reviewer 2: Page 13, line 432.**

135 Alternative, but related definition is that of Hungr, i.e. landslide growth rate =  $V_{\text{final}} / V_{\text{initial}}$

136 **Authors:** Thank you for pointing out Hungr’s definition. We will verify which metric are used in  
137 the other papers which we reference, and for the next version of the manuscript we will choose the  
138 most suitable metric (as well as cite Hungr’s landslide growth factor).
